# Supplementary material
Source: PubMed Central journal article supplement (PMC10457275)

# Supplementary materials

Supplementary figure 1: Original gels for the western blot of Figure 1.

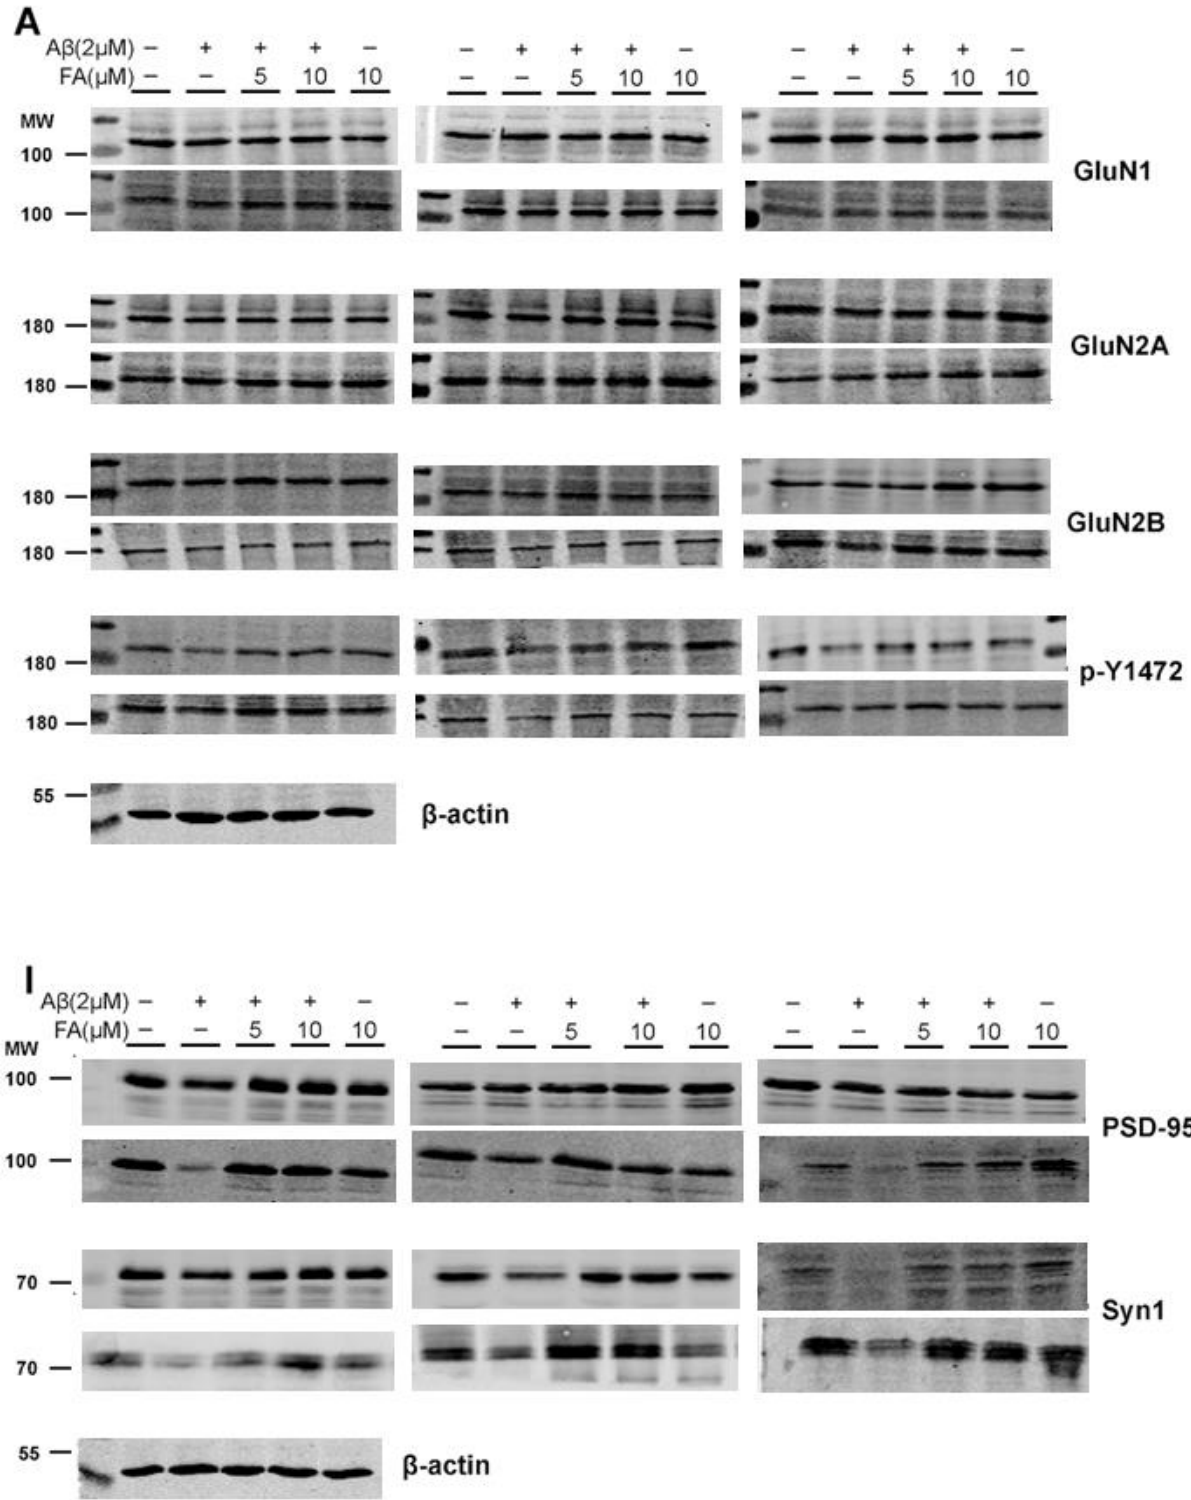

Supplementary figure 2: Original gels for the western blot of Figure 2.

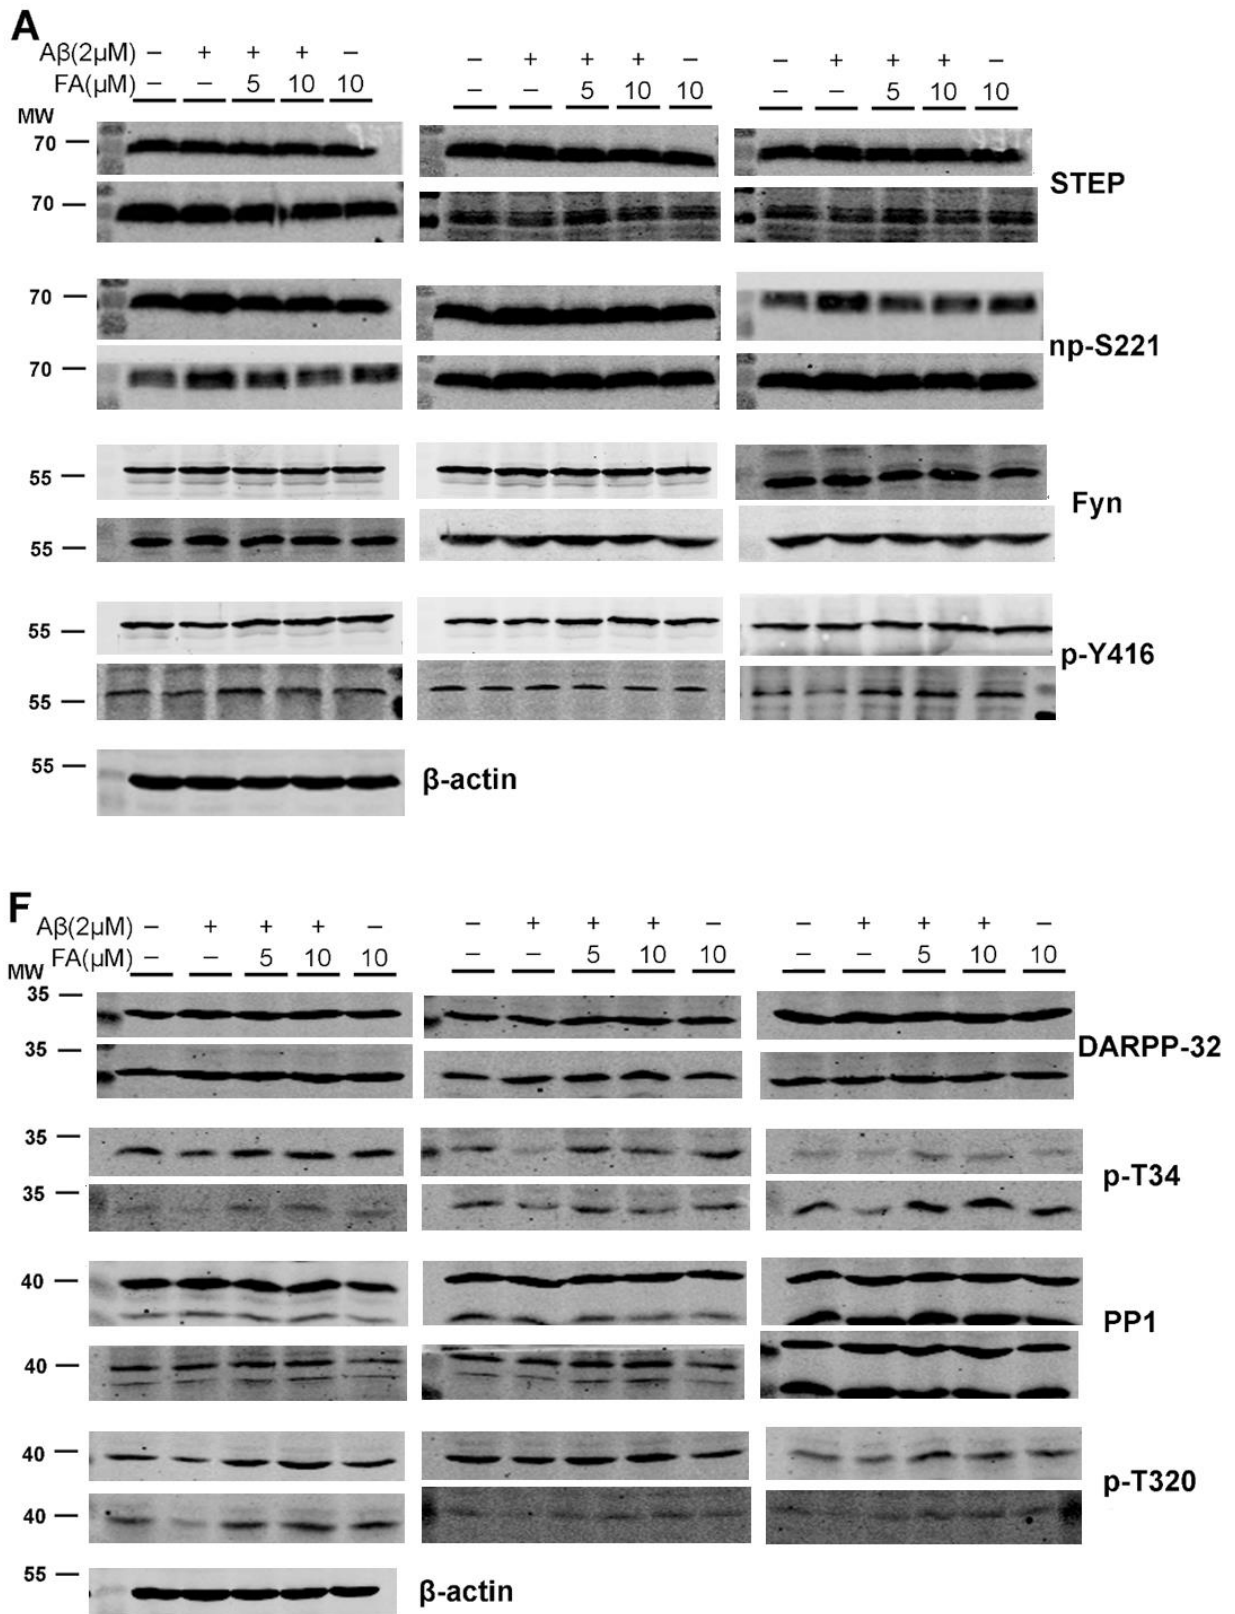

Supplementary figure 3: Original gels for the western blot of Figure 3.

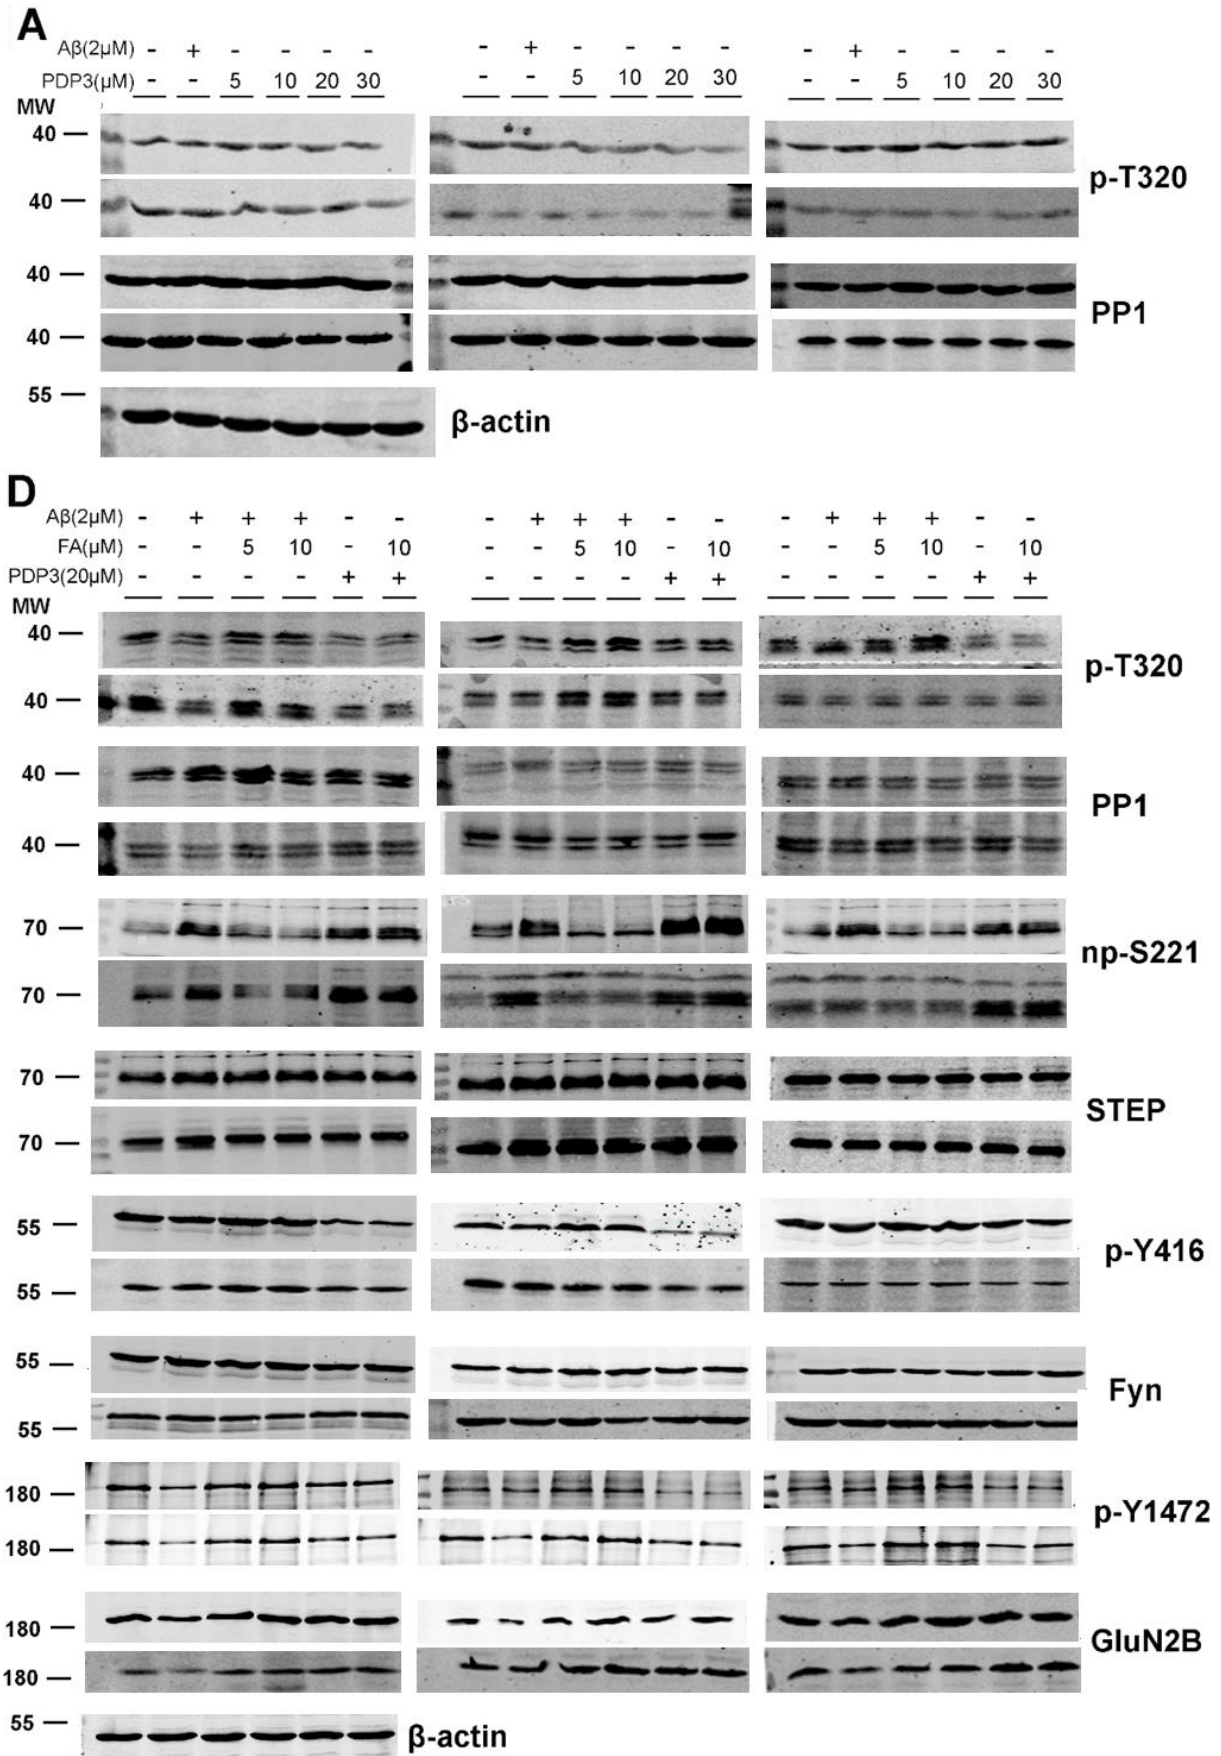

Supplementary figure 4: Original gels for the western blot of Figure 5.

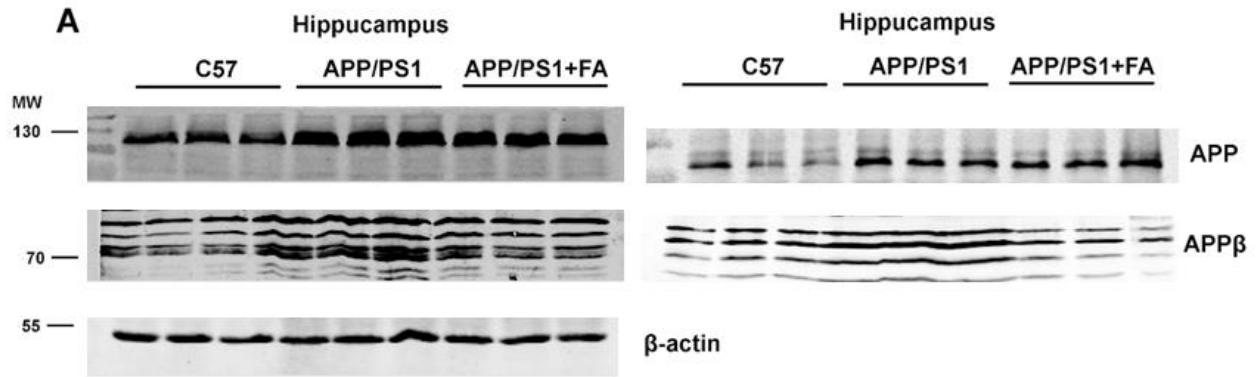

Supplementary figure 5: Original gels for the western blot of Figure 6.

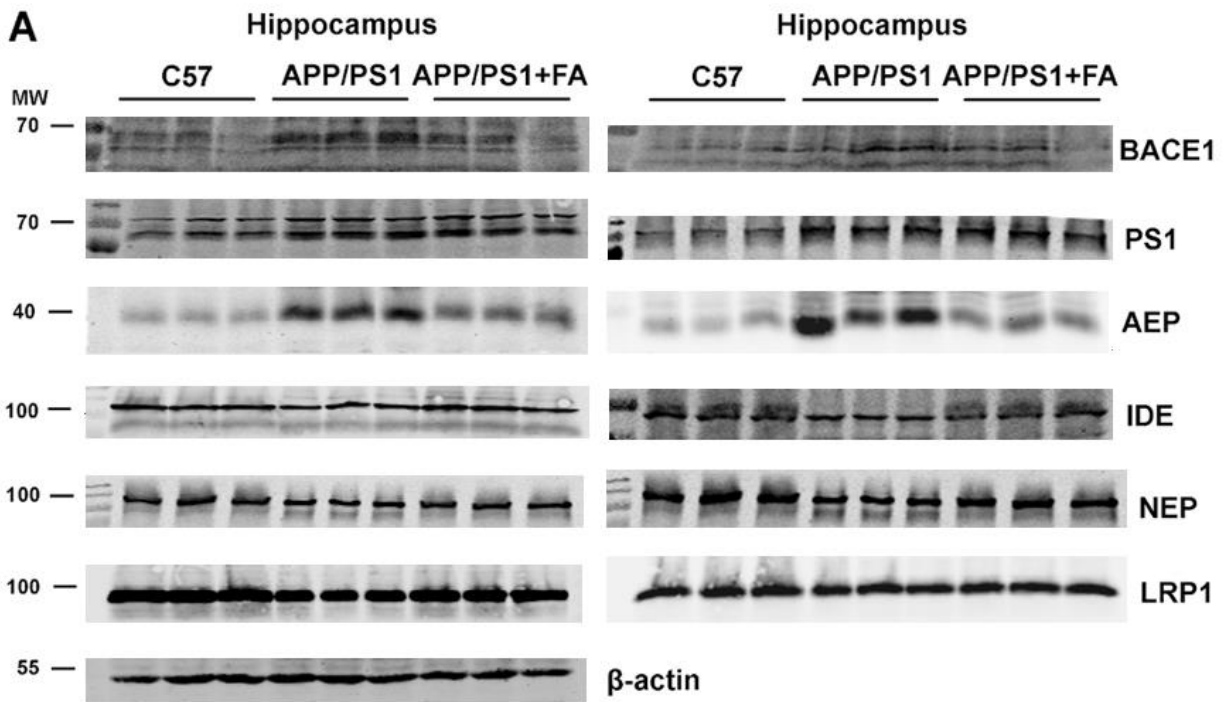

Supplementary figure 6: Original gels for the western blot of Figure 7.

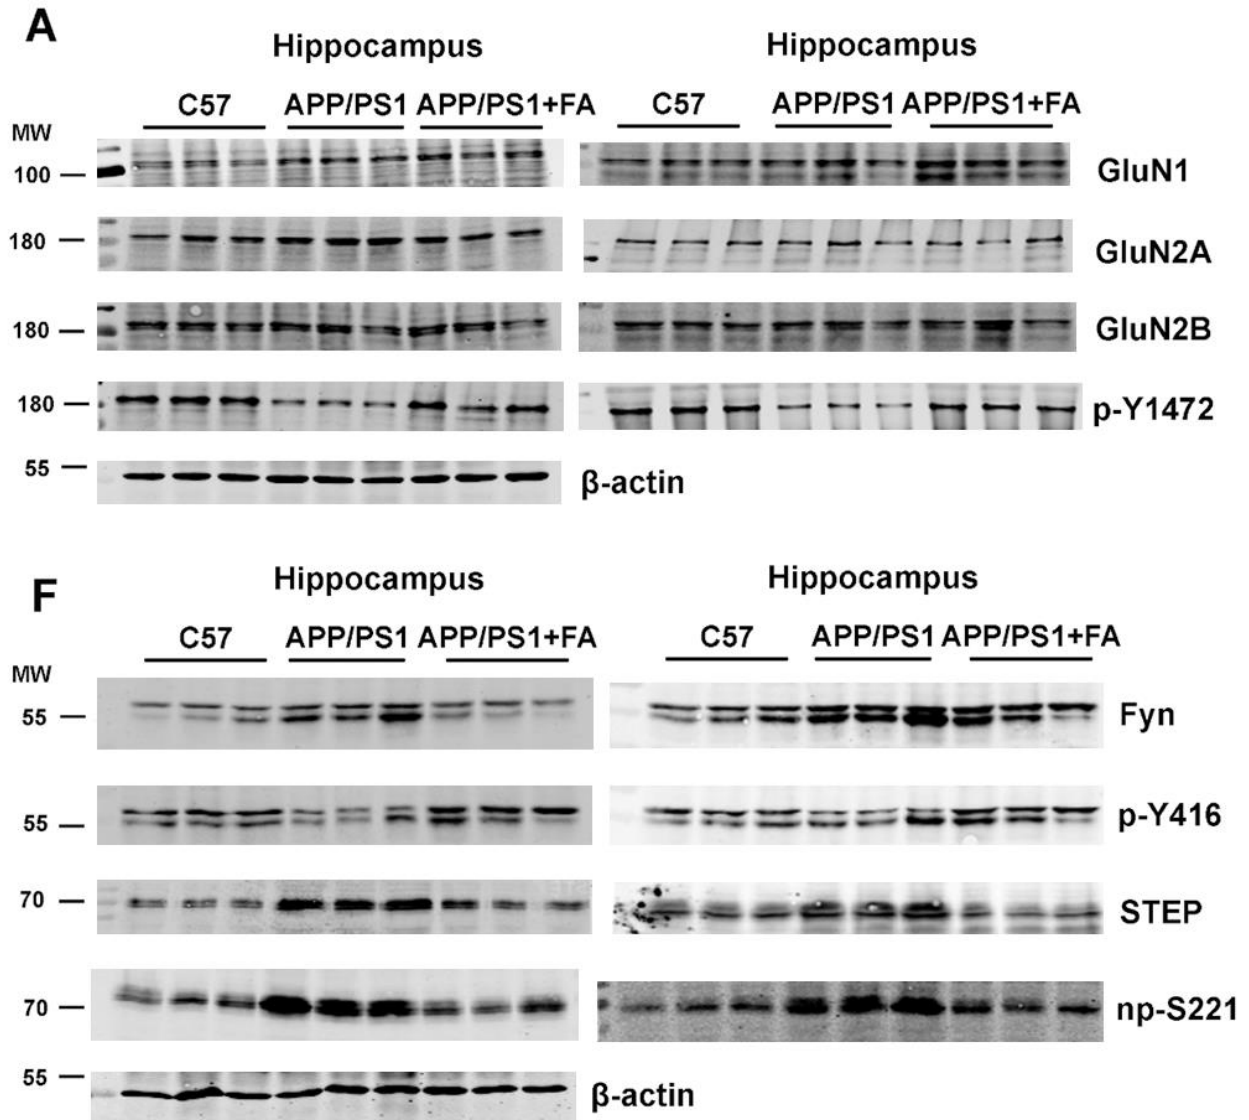

Supplementary figure 7: Original gels for the western blot of Figure 8.

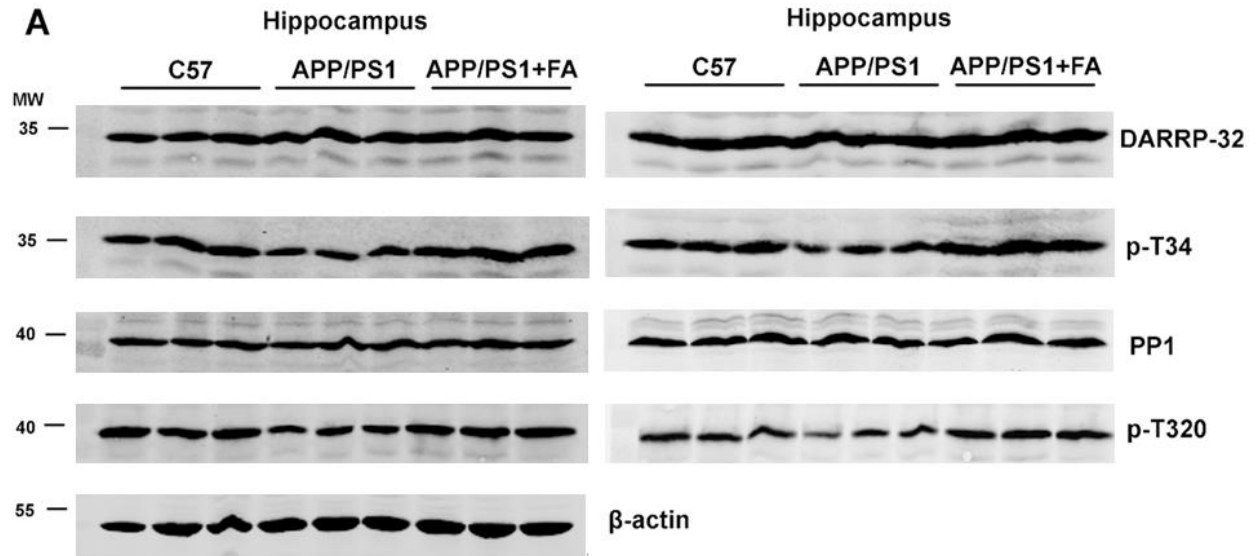

Supplementary figure 8: Original gels for the western blot of Figure 9.

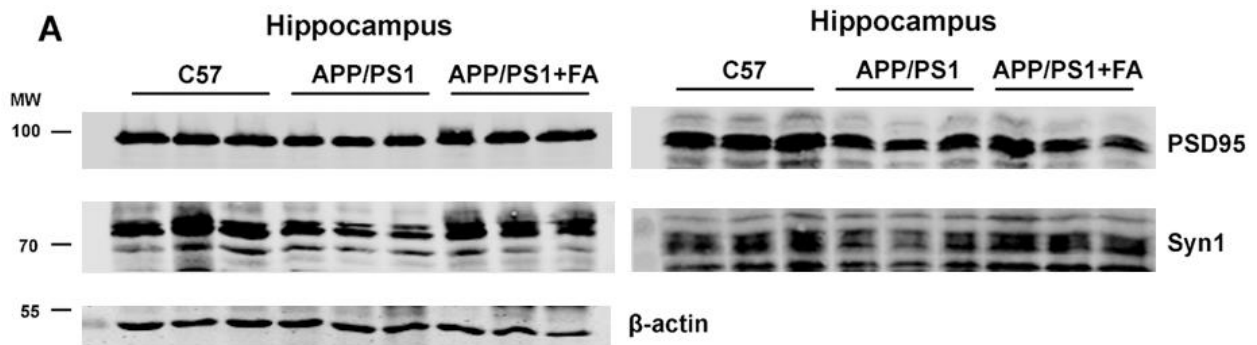

Supplementary figure 9: Original gels for the western blot of Figure 10.

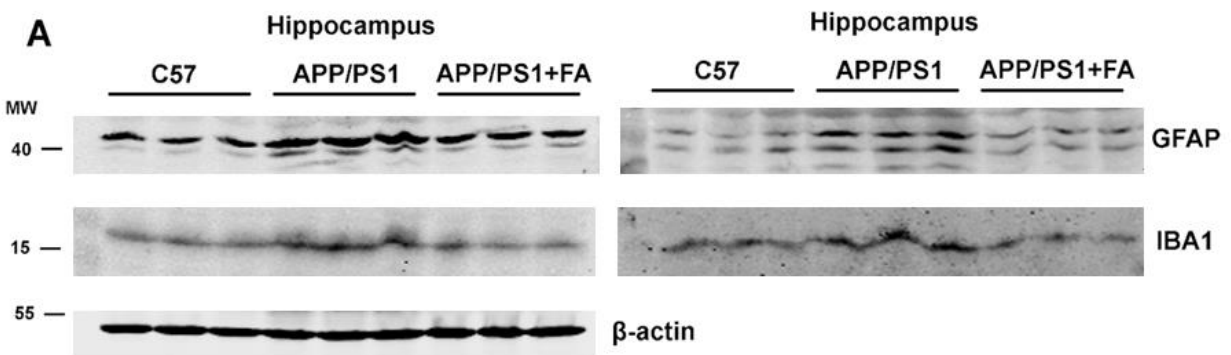

Supplement: 13311_2023_1356_MOESM1_ESM.pdf [file 13311_2023_1356_MOESM1_ESM.pdf]
